# Supplementary material for: Deoxyvasicinone with Anti-Melanogenic Activity from Marine-Derived Streptomyces sp. CNQ-617
Source: MDPI journal article supplement (doi:10.3390/md20020155), 2022-02-21

# Deoxyvasicinone with the anti-melanogenic activity from a marine-derived *Streptomyces* sp. CNQ-617

**Se-eun Lee<sup>1,†</sup>, Min-ju Kim<sup>2,†</sup>, Prima F. Hillman<sup>3</sup>, Dong-Chan Oh<sup>4</sup>, William Fenical<sup>5</sup>, Sang-Jip Nam<sup>3,\*</sup>, and Kyung-Min Lim<sup>1,\*</sup>**

<sup>1</sup> College of Pharmacy, Ewha Womans University, Seoul 03760, Korea; 0213lse@naver.com (S.L.), kmlim@ewha.ac.kr (K.-M.L.)

<sup>2</sup> The Graduate School of Industrial Pharmaceutical Sciences, Ewha Womans University, Seoul 03760, Republic of Korea; bm4976@gmail.com (M.K.)

<sup>3</sup> Department of Chemistry and Nanoscience, Ewha Womans University, Seoul, 03760, Republic of Korea; primafitriah@gmail.com (P.F.H.), sjnam@ewha.ac.kr (S.-J.N.)

<sup>4</sup> Natural Products Research Institute, College of Pharmacy, Seoul National University, Seoul 08826, Korea; dongchanoh@snu.ac.kr (D.-C.O.)

<sup>5</sup> Center for Marine Biotechnology and Biomedicine, Scripps Institution of Oceanography, University of California-San Diego, CA 92093-0204, USA; wfenical@ucsd.edu (W.F.)

\* Correspondence: sjnam@ewha.ac.kr (S.-J.N.), kmlim@ewha.ac.kr (K.-M.L.)

† These authors contributed equally to this work

## Table of Contents

|                                                                                                                         |           |
|-------------------------------------------------------------------------------------------------------------------------|-----------|
| <b>Figure S1.</b> $^1\text{H}$ NMR spectrum (400 MHz, $\text{CD}_3\text{OD}$ ) of deoxyvasicinone ( <b>1</b> ) .....    | <b>S3</b> |
| <b>Figure S2.</b> $^{13}\text{C}$ NMR spectrum (100 MHz, $\text{CD}_3\text{OD}$ ) of deoxyvasicinone ( <b>1</b> ) ..... | <b>S4</b> |

**Figure S1.**  $^1\text{H}$  NMR spectrum (400 MHz,  $\text{CD}_3\text{OD}$ ) of dooxyvasicinone (**1**)

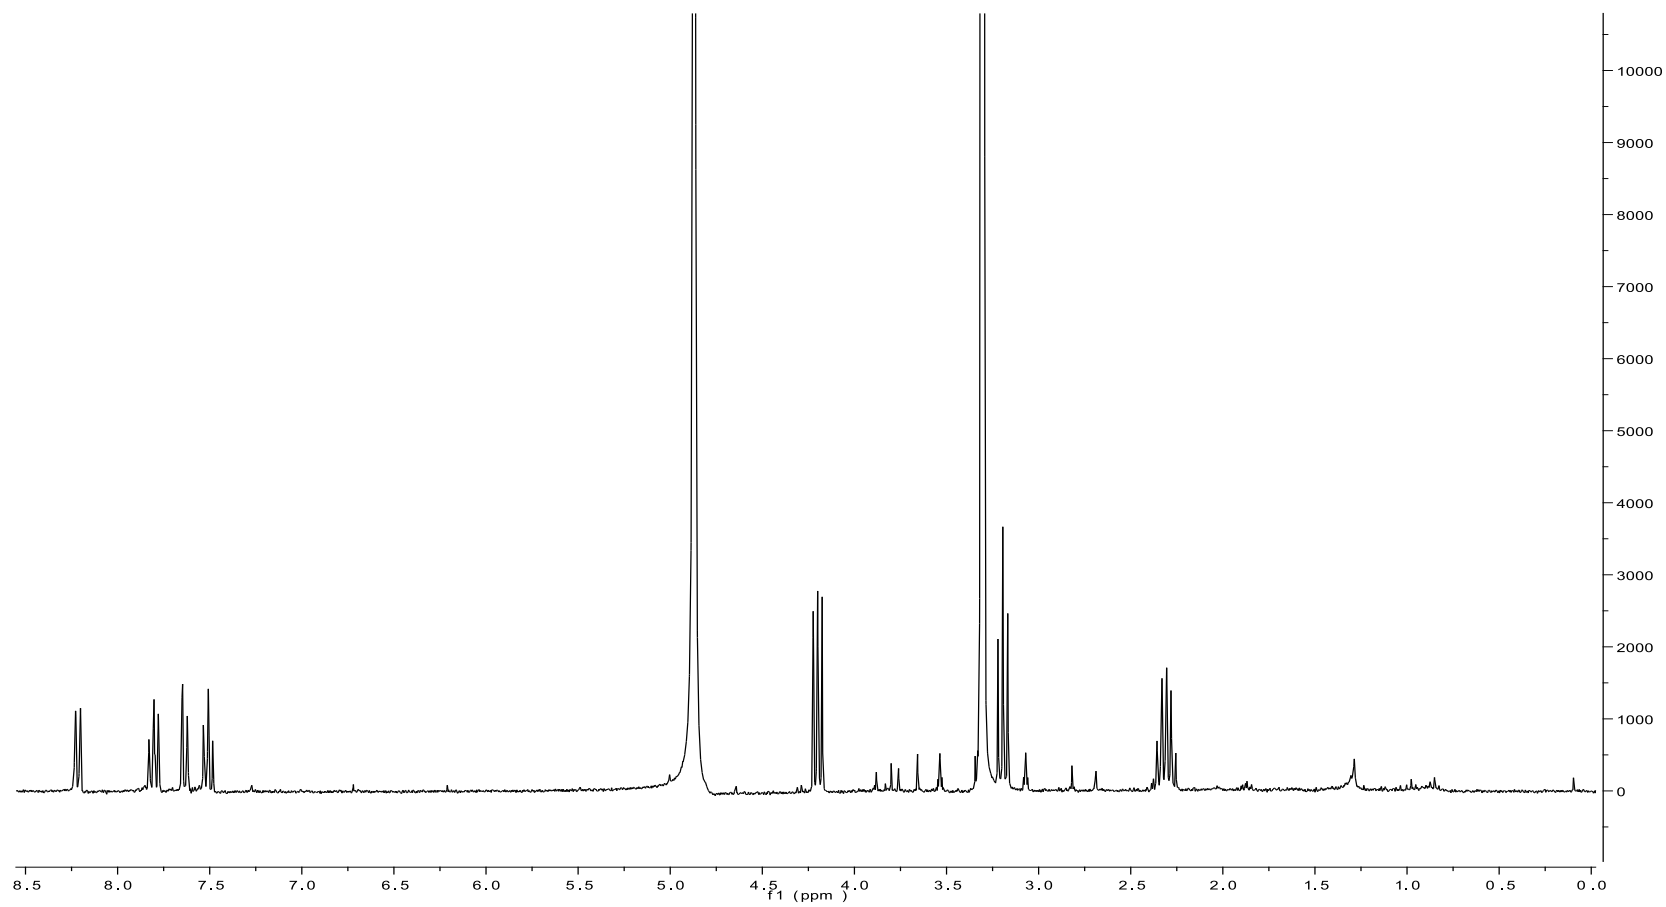

**Figure S2.**  $^{13}\text{C}$  NMR spectrum (100 MHz,  $\text{CD}_3\text{OD}$ ) of dooxyvasicinone (**1**)

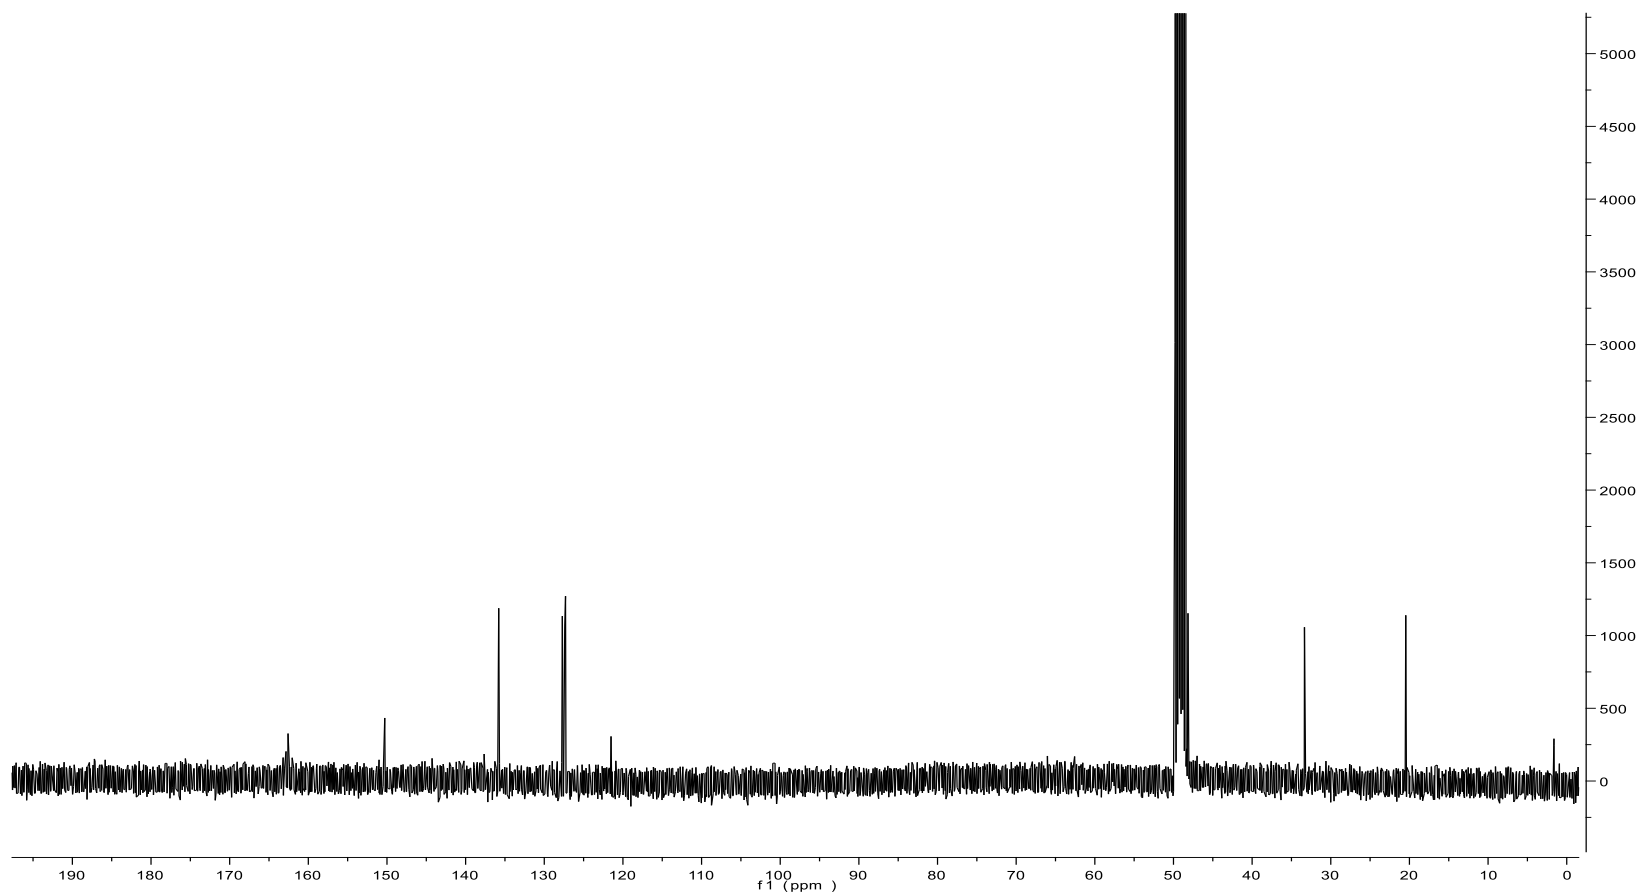

Supplement: s1 [file s1]
